# Supplementary material for: Green Analytical Method for Simultaneous Determination of Glucosamine and Calcium in Dietary Supplements by Capillary Electrophoresis with Capacitively Coupled Contactless Conductivity Detection
Source: J Anal Methods Chem. 2023 Jan 31;2023:2765508. doi: 10.1155/2023/2765508 (PMC9904918; doi:10.1155/2023/2765508)
Supplement: Supplementary Materials — Table S1. The background noise, peak area, and migration time of glucosamine and Ca2+ at different BGE conditions. Table S2: The background noise, peak area, and migration time of glucosamine and Ca2+ at different pH conditions. Table S3: The background noise, peak area, and migration time of glucosamine and Ca2+ at different Tris concentrations. Table S4: The background noise, peak area, and migration time of glucosamine and Ca2+ at different seperation voltages. Table S5: The background noise, peak area, and migration time of glucosamine and Ca2+ at different injection time (siphoning at 25 cm). Table S6: The background noise, peak area, and migration time of glucosamine and Ca2+ at different siphoning height (injection time 30 s). Table S7. The optimal conditions of the CE-C4D method for simultaneous determination of glucosamine and Ca2+. Table S8. The optimal conditions for determination of glucosamine by HPLC-FLD and Ca2+ by ICP-OES. Table S9. LOD and LOQ of glucosamine and Ca2+. Table S10. The repeatability evaluation of peak area (mV.s) and migration time (min) for simultaneous determination of glucosamine and Ca2+ by CE-C4D. Table S11. Recoveries for simultaneous determination of glucosamine and Ca2+ by CE-C4D. [file 2765508.f1.docx]

**Supporting Information**

**Green analytical method for simultaneous determination of glucosamine and calcium in dietary supplements by capillary electrophoresis coupled with contactless conductivity detection**

Yen Nhi Do a, Thi Lan Phuong Kieu a,b, Thi Huyen My Dang a, Quang Huy Nguyen a,c, Thu Hien Dang b**,** Cao Son Tran b, Anh Phuong Vu d, Thi Trang Do d, Thi Ngan Nguyen d, Son Luong Dinh d, Thi Minh Thu Nguyen a, Thi Ngoc Mai Pham a, Anh Quoc Hoang a, Bach Pham a,*, Thi Anh Huong Nguyen a,*

a *Faculty of Chemistry, University of Science, Vietnam National University, Hanoi, 19 Le Thanh Tong, Hanoi 10000, Vietnam*

b *National Institute for Food Control (NIFC), 65 Pham Than Duat, Hanoi 10000, Vietnam*

c *Faculty of Pharmacy, University of Medicine and Pharmacy, Thai Nguyen University, 284 Luong Ngoc Quyen, Thai Nguyen 24000, Vietnam*

d *Poison Control Center, Bach Mai Hospital, 78 Giai Phong, Hanoi 10000, Vietnam*

**Correspondence should be addressed to:**

Thi Anh Huong Nguyen ([nguyenthianhhuong@hus.edu.vn](mailto:nguyenthianhhuong@hus.edu.vn))

Bach Pham ([phamgiabach@hus.edu.vn](mailto:phamgiabach@hus.edu.vn))

**Table S1.** The background noise, peak area, and migration time of glucosamine and Ca2+ at different BGE conditions

| Analytes | Buffer | | | | | | | | | | | |
| --- | --- | --- | --- | --- | --- | --- | --- | --- | --- | --- | --- | --- |
| Tris/Ace | | | Arg/Ace | | | His/Ace | | | CAPS/Ace | | |
| Noise  (mV) | Speak (mV.s) | Time  (min) | Noise  (mV) | Speak (mV.s) | Time  (min) | Noise  (mV) | Speak (mV.s) | Time  (min) | Noise  (mV) | Speak (mV.s) | Time  (min) |
| Ca | 0.76 | 27.59 | 1.99 | 1.12 | 36.08 | 1.95 | 0.62 | 43.01 | 1.94 | 0.45 | 4.02 | 1.99 |
| Glucosamine | 13.47 | 2.60 | 2.47 | 2.71 | 1.51 | 2.71 | 2.35 | 2.67 |

| Analytes | pH | | | | | | | | | | | | | | |
| --- | --- | --- | --- | --- | --- | --- | --- | --- | --- | --- | --- | --- | --- | --- | --- |
| pH=4.5 | | | pH=5.0 | | | pH=5.5 | | | pH=6 | | | pH=6.5 | | |
| Noise  (mV) | Speak (mV.s) | Time  (min) | Noise  (mV) | Speak (mV.s) | Time  (min) | Noise  (mV) | Speak (mV.s) | Time  (min) | Noise  (mV) | Speak (mV.s) | Time  (min) | Noise  (mV) | Speak (mV.s) | Time  (min) |
| Ca | 0.73 | 32.63 | 1.95 | 0.80 | 37.56 | 1.95 | 0.68 | 32.84 | 1.91 | 0.75 | 38.12 | 1.91 | 0.78 | 37.45 | 1.92 |
| Glucosamine | 12.66 | 2.78 | 14.57 | 2.60 | 16.05 | 2.62 | 11.96 | 2.50 | 12.57 | 2.52 |

**Table S2 :** The background noise, peak area, and migration time of glucosamine and Ca2+ at different pH conditions.

**Table S3:** The background noise, peak area, and migration time of glucosamine and Ca2+ at different Tris concentrations

| Analytes | Buffer concentration | | | | | | | | | | | |
| --- | --- | --- | --- | --- | --- | --- | --- | --- | --- | --- | --- | --- |
| 8 mM | | | 10 mM | | | 15 mM | | | 20 mM | | |
| Noise  (mV) | Speak (mV.s) | Time  (min) | Noise  (mV) | Speak (mV.s) | Time  (min) | Noise  (mV) | Speak (mV.s) | Time  (min) | Noise  (mV) | Speak (mV.s) | Time  (min) |
| Ca | 1.02 | 45.17 | 1.95 | 1.02 | 38.03 | 1.99 | 0.86 | 10.23 | 1.95 | 0.42 | 7.98 | 1.95 |
| Glucosamine | 18.78 | 2.70 | 14.45 | 2.59 | 5.01 | 2.59 | 3.74 | 2.62 |

**Table S4:** The background noise, peak area, and migration time of glucosamine and Ca2+ at different seperation voltages

| Analytes | Voltage | | | | | | | | | | | |
| --- | --- | --- | --- | --- | --- | --- | --- | --- | --- | --- | --- | --- |
| +10kV | | | +15 kV | | | +20 kV | | | +25 kV | | |
| Noise  (mV) | Speak (mV.s) | Time  (min) | Noise  (mV) | Speak (mV.s) | Time  (min) | Noise  (mV) | Speak (mV.s) | Time  (min) | Noise  (mV) | Speak (mV.s) | Time  (min) |
| Ca | 0.67 | 50.55 | 2.21 | 1.21 | 37.51 | 1.85 | 1.53 | 32.02 | 1.41 | 2.06 | 26.03 | 1.23 |
| Glucosamine | 23.02 | 4.49 | 16.03 | 3.31 | 15.07 | 2.97 | 10.03 | 2.15 |

**Table S5:** The background noise, peak area, and migration time of glucosamine and Ca2+ at different injection time (siphoning at 25 cm)

| Analytes | Injection time | | | | | | | | | | | |
| --- | --- | --- | --- | --- | --- | --- | --- | --- | --- | --- | --- | --- |
| 20 s | | | 25 s | | | 30 s | | | 35 s | | |
| Noise  (mV) | Speak (mV.s) | Time  (min) | Noise  (mV) | Speak (mV.s) | Time  (min) | Noise  (mV) | Speak (mV.s) | Time  (min) | Noise  (mV) | Speak (mV.s) | Time  (min) |
| Ca | 1.05 | 12.20 | 1.78 | 0.85 | 25.04 | 1.82 | 0.83 | 33.12 | 1.88 | 0.80 | 48.24 | 1.90 |
| Glucosamine | 5.32 | 2.75 | 10.34 | 2.96 | 15.65 | 2.99 | 20.05 | 2.99 |

**Table S6:** The background noise, peak area, and migration time of glucosamine and Ca2+ at different siphoning height (injection time 30 s)

| Analytes | Siphoning height | | | | | | | | |
| --- | --- | --- | --- | --- | --- | --- | --- | --- | --- |
| 20 cm | | | 25 cm | | | 30 cm | | |
| Noise  (mV) | Speak (mV.s) | Time  (min) | Noise  (mV) | Speak (mV.s) | Time  (min) | Noise  (mV) | Speak (mV.s) | Time  (min) |
| Ca | 0.80 | 25.15 | 1.89 | 0.83 | 33.12 | 1.88 | 0.87 | 47.89 | 1.88 |
| Glucosamine | 10.23 | 2.99 | 15.65 | 2.99 | 20.14 | 2.99 |

**Table S7.** The optimal conditions of CE-C4D method for simultaneous determination of glucosamine and Ca2+

| **Factors** | **Optimal conditions** |
| --- | --- |
| Detector | CE-C4D |
| Capillary | Silica capillary, total length of 40cm, effective length of 30cm, inner diameter of 50µm |
| Method of injection | Hydrodynamic (siphoning) |
| Electrolyte solution | Tris/Ace 10mM, pH of 5.0 |
| Separation voltage | +20kV |
| Sample injection time | 30s, siphoning at 25 cm height |

**Table S8.** The optimal conditions for determination of glucosamine by HPLC-FLD and Ca2+ by ICP-OES

| **Reference methods for determination of glucosamine (HPLC-FLD)** | **Reference methods for determination of Ca2+**  **(ICP-OES)** |
| --- | --- |
| Detection mode: Fluorescence  Excitation wavelength λex 265 nm  Emission wavelength λem 315 nm  C18 column (150 mm x 4.6 mm x 5 µm) (Waters Corporation)  Flow rate: 1 mL/min  Injection volume: 20 µL  HPLC Gradient Program   | Time (min) | A (H2O) (%) | B (Acetonitrile) (%) | | --- | --- | --- | | 0.01 | 70 | 30 | | 6.00 | 10 | 90 | | 8.00 | 10 | 90 | | 8.01 | 70 | 30 | | 13.00 | 70 | 30 |   Pre-column derivatization of glucosamine with 9-fluorenylmethoxycarbonyl chloride (FMOC) :  - 200 µL of the sample was first accurately pipetted to a 1.8 mL vial, then 400 µL borate buffer (pH = 8.0) and 400 µ of FMOC 500 ppm were added. The mixture was shaken for around 10 s before being allowed to react at room temperature for at least 30 min. Finally, the reaction mixture was analyzed by HPLC-FLD | Power: 1.1 kW  Plasma gas flow: 15.0 L/min  Auxiliary gas flow: 0.2 L/min  Wavelength: 317.933 nm  Nebulizer: 0.8 L/min  Plasma view: Radial  Sample flow rate: 1.5 mL/min  Delay time: 30 s |

**Table S9.** LOD and LOQ of glucosamine and Ca2+

| **Analytes** | **Conc. (mg/L)** | **Peak height (S)**  **(mV)** | **Background noise signal (N)**  **(mV)** | **S/N** | **LOD (mg/L)** | **LOQ (mg/L)** |
| --- | --- | --- | --- | --- | --- | --- |
| Glucosamine | 1.00 | 0.52 | 0.17 | 3.06 | **1.00** | **3.30** |
| Calcium | 0.05 | 0.63 | 0.20 | 3.15 | **0.05** | **0.17** |

**Table S10.** The repeatability evaluation of peak area (mV.s) and migration time (min) for simultaneously determination of glucosamine and Ca2+ by CE-C4D

| **Analyte** | **Conc. (mg/L)** | **Peak area (mV.s)** | | | | | **Average peak area (mV.s)** | **RSD (%)** | **Migration time (min)** | | | | | **Average**  **(min)** | **RSD (%)** |
| --- | --- | --- | --- | --- | --- | --- | --- | --- | --- | --- | --- | --- | --- | --- | --- |
| **1** | **2** | **3** | **4** | **5** | **1** | **2** | **3** | **4** | **5** |
| Ca2+ | 20.00 | 39.20 | 38.20 | 40.10 | 40.50 | 39.50 | 40.30 | **2.16** | 1.87 | 1.84 | 1.85 | 1.82 | 1.80 | 1.84 | **1.13** |
| 40.00 | 59.70 | 58.90 | 60.70 | 58.80 | 59.70 | 59.60 | **1.15** | 1.86 | 1.89 | 1.87 | 1.88 | 1.88 | 1.88 | **0.47** |
| 80.00 | 136.50 | 134.50 | 138.40 | 136.10 | 136.70 | 136.40 | **0.92** | 1.95 | 1.90 | 1.86 | 1.89 | 1.91 | 1.90 | **1.18** |
| Glucosamine | 20.00 | 2.17 | 2.06 | 2.15 | 2.19 | 2.09 | 2.08 | **2.52** | 2.89 | 2.90 | 2.92 | 2.95 | 2.92 | 2.92 | **0.58** |
| 40.00 | 4.74 | 4.85 | 4.73 | 4.87 | 4.88 | 4.79 | **1.37** | 2.89 | 2.97 | 2.93 | 2.98 | 3.01 | 2.96 | **1.24** |
| 80.00 | 9.13 | 9.26 | 9.22 | 9.10 | 9.09 | 9.23 | **0.80** | 2.92 | 2.89 | 3.12 | 3.00 | 2.98 | 2.98 | **2.09** |

**Table S11.** Recoveries for simultaneously determination of glucosamine and Ca2+ by CE-C4D

| **Analyte** | **No.** | **Standard concentration added (mg/L)** | **Recovery concentration (mg/L)** | **Recovery (%)** | **Average recovery (%)** |
| --- | --- | --- | --- | --- | --- |
| Ca2+ | 1 | 4.00 | 3.92 | 98.0 | **99.8** |
| 2 | 8.00 | 8.22 | 103 |
| 3 | 10.0 | 9.85 | 98.5 |
| Glucosamine | 1 | 40.0 | 40.8 | 102 | **100.0** |
| 2 | 80.0 | 77.5 | 96.9 |
| 3 | 100 | 101 | 102 |
